# Supplementary material
Source: PubMed Central journal article supplement (PMC3511764)
Supplement: 1213170109_pnas.201213170SI.pdf [file 1213170109_pnas.201213170SI.pdf]

# Supporting Information

Rieiro et al. 10.1073/pnas.1213170109

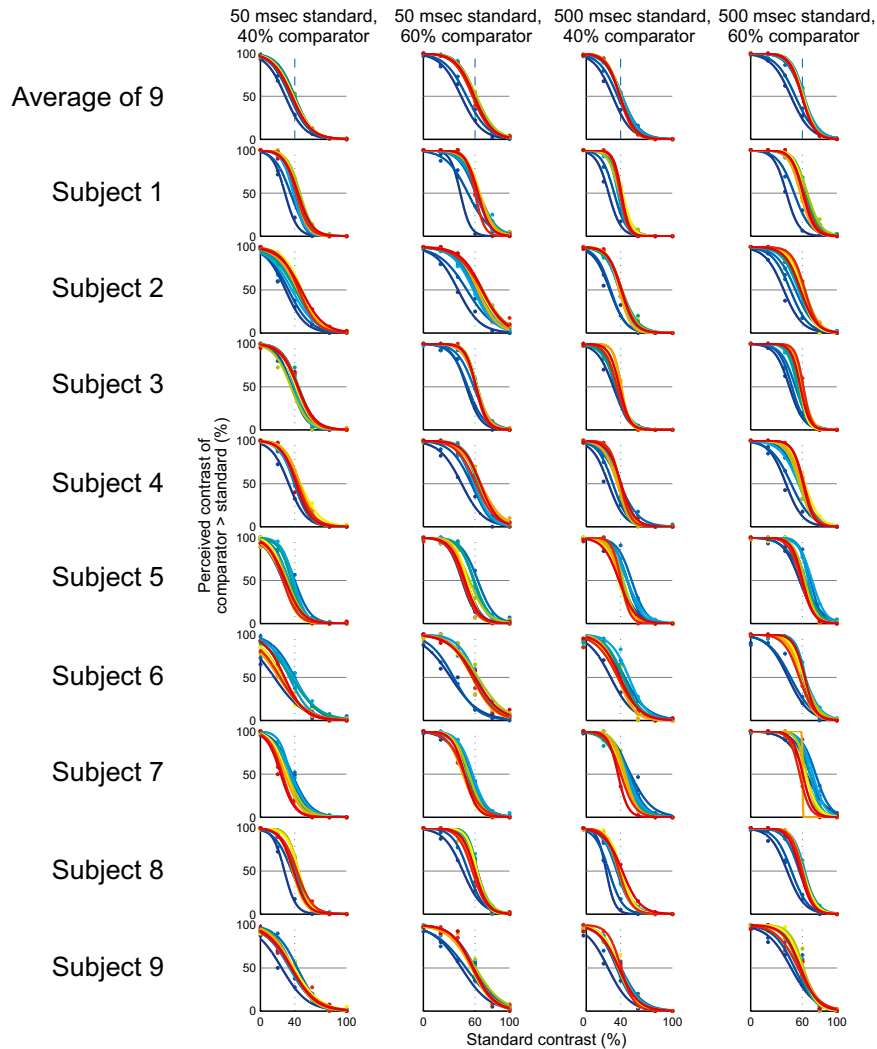

**Fig. S1.** Psychometric curves for the unblocked experiment. Top row shows psychometric curves for the subject average. Subsequent rows show psychometric curves for individual subjects. Columns show the four different combinations of standard duration and comparator contrast. All psychometric curves present a similar pattern, shifting initially to the right and then translating to the left with increasing stimulus durations, in agreement with the Broca-Sulzer effect. Color coding as in Figs. 1–3.
